# Supplementary material
Source: PubMed Central journal article supplement (PMC3583975)
Supplement: psb-7-847-s01.pdf [file psb-7-847-s01.pdf]

Supplemental Material to: Amarjeet Singh, Amita Pandey, Vinay Baranwal, Sanjay Kapoor and Girdhar Pandey. Comprehensive expression analysis of rice phospholipase D gene family during abiotic stresses and development. *Plant Signaling & Behavior* 2012; 7(7); DOI: 10.4161/psb.20385; <http://www.landesbioscience.com/journals/psb/article/20385/>

**Table S1:** Microarray expression data for rice PLDs during developmental stages.

**Table S2.** Phospholipase D genes in segmental and tandem duplication.

**Table S3.** *Cis*- regulatory elements in the promoter of *OsPLD* genes

**Table S4.** List of primers used for real time PCR expression analysis.

**Table S1:** Microarray expression data for rice PLDs during developmental stages.

| Probe Set ID         | RGAP Locus     | Gene                             | Leaf        | Root        | Seedling    |
|----------------------|----------------|----------------------------------|-------------|-------------|-------------|
| Os.155.1.S1_a_at     | LOC_Os01g07760 | <i>OsPLD<math>\alpha</math>1</i> | 6242.175367 | 5269.7321   | 3925.633933 |
| OsAffx.4272.1.S1_at  | LOC_Os05g07880 | <i>OsPLD<math>\alpha</math>2</i> | 4.885467467 | 4.8859167   | 4.8859167   |
| Os.9878.1.S1_at      | LOC_Os06g40190 | <i>OsPLD<math>\alpha</math>3</i> | 32.34515533 | 245.8057133 | 86.64023    |
| Os.50455.1.S1_at     | LOC_Os06g40170 | <i>OsPLD<math>\alpha</math>4</i> | 30.02408167 | 69.610583   | 151.44772   |
| Os.50104.1.S1_at     | LOC_Os06g40180 | <i>OsPLD<math>\alpha</math>5</i> | 15.32418467 | 479.63165   | 71.06982    |
| Os.54571.2.A1_at     | LOC_Os03g27370 | <i>OsPLD<math>\alpha</math>6</i> | 6.2241519   | 10.2967936  | 6.215006033 |
| OsAffx.29446.1.S1_at | LOC_Os08g31060 | <i>OsPLD<math>\alpha</math>7</i> | 4.8859167   | 4.8859167   | 4.8859167   |
| Os.50273.1.S1_at     | LOC_Os09g25390 | <i>OsPLD<math>\alpha</math>8</i> | 5.625645667 | 5.438678333 | 5.4247791   |
| Os.9389.2.S1_s_at    | LOC_Os10g38060 | <i>OsPLD<math>\beta</math>1</i>  | 5.921981233 | 7.477710633 | 7.013898933 |
| Os.34954.1.S1_at     | LOC_Os03g02740 | <i>OsPLD<math>\beta</math>2</i>  | 6.555895033 | 6.3168688   | 6.279851333 |
| Os.11408.1.S1_at     | LOC_Os09g37100 | <i>OsPLD<math>\delta</math>1</i> | 6.0737009   | 6.752823367 | 5.648432733 |
| Os.52881.1.S1_at     | LOC_Os03g62410 | <i>OsPLD<math>\delta</math>2</i> | 4.961771967 | 4.7666548   | 4.814851833 |
| Os.5744.1.S1_at      | LOC_Os07g15680 | <i>OsPLD<math>\delta</math>3</i> | 5.097351367 | 4.770667233 | 4.747158767 |
| OsAffx.14869.1.S1_at | LOC_Os05g29050 | <i>OsPLD<math>\zeta</math>1</i>  | 66.06942333 | 47.42767333 | 32.045736   |
| Os.6185.1.S1_at      | LOC_Os06g44060 | <i>OsPLD<math>\phi</math></i>    | 22.93798933 | 109.5162267 | 66.52531967 |
| Os.56801.1.S1_at     | LOC_Os02g02790 | <i>OsPLD<math>\kappa</math></i>  | 7.658374    | 6.794856333 | 6.562208433 |

| <b>P1</b>   | <b>P2</b>   | <b>P3</b>   | <b>P4</b>   | <b>P5</b>   | <b>P6</b>   |
|-------------|-------------|-------------|-------------|-------------|-------------|
| 8216.726467 | 5704.326167 | 6257.542133 | 7620.719567 | 5049.498667 | 5664.5192   |
| 4.879523667 | 4.883019267 | 4.883351133 | 4.8823817   | 4.883234467 | 5.1667771   |
| 122.3706883 | 100.6796817 | 137.2211917 | 162.88022   | 396.6111533 | 87.77563167 |
| 400.43377   | 273.3897467 | 1619.810367 | 935.5627233 | 203.5852967 | 1594.2859   |
| 1223.395353 | 435.23476   | 3160.006833 | 741.32849   | 50.04992767 | 421.2965033 |
| 5.849061333 | 5.865159567 | 7.363544    | 17.01129333 | 14.4064838  | 6.002412033 |
| 4.8859167   | 4.8859167   | 4.876525567 | 4.886024467 | 4.8808858   | 4.8859167   |
| 5.4492021   | 5.977885533 | 5.421123533 | 5.444078933 | 15.79280153 | 271.0026667 |
| 10.70430223 | 7.188466567 | 9.211326    | 15.23456633 | 8.560852667 | 7.91132     |
| 6.4347938   | 6.8076636   | 6.4520285   | 6.8016278   | 9.998038667 | 7.610323833 |
| 8.155209467 | 5.212225333 | 8.836985167 | 15.53646367 | 10.61083087 | 10.70439057 |
| 4.77767     | 4.8364683   | 4.738279833 | 4.767397933 | 4.764099667 | 4.769329767 |
| 5.685199333 | 4.830766567 | 4.733914933 | 4.716392067 | 5.053959833 | 7.9616506   |
| 35.165629   | 8.527677433 | 82.035249   | 53.09612333 | 29.000332   | 237.7374633 |
| 51.02877933 | 39.65344267 | 56.222913   | 50.08632533 | 43.53316767 | 55.92037233 |
| 6.506331567 | 6.806967133 | 7.837911733 | 9.990254133 | 7.455299667 | 6.6182728   |

| S1          | S2          | S3          | S4          | S5          |
|-------------|-------------|-------------|-------------|-------------|
| 5965.788    | 4615.543933 | 3874.0094   | 4461.213933 | 5890.9198   |
| 4.878945033 | 4.878042233 | 4.8795284   | 4.8859167   | 4.883541567 |
| 146.41943   | 89.16045667 | 48.36223467 | 32.99898633 | 30.253009   |
| 338.11015   | 43.871687   | 65.26046233 | 13.04123743 | 7.9226232   |
| 91.200898   | 20.20209917 | 4.736105967 | 4.7719552   | 4.8130933   |
| 5.7907314   | 6.010590833 | 6.170799833 | 6.344185833 | 6.079778667 |
| 4.8859167   | 4.8859167   | 4.8889467   | 4.8762434   | 4.8859167   |
| 5.548434667 | 5.422189867 | 5.413384933 | 6.8370115   | 5.9749213   |
| 9.368799    | 10.21040733 | 8.948062    | 7.472738433 | 7.4958978   |
| 6.436263667 | 6.2115829   | 6.067419033 | 6.626155533 | 6.616352467 |
| 5.498324167 | 5.433400333 | 5.310419933 | 6.419083233 | 6.030744667 |
| 4.742399233 | 4.713208933 | 4.7425319   | 4.862373367 | 5.063719867 |
| 5.270414967 | 4.689629867 | 4.694068467 | 4.823346533 | 4.852945633 |
| 173.0901867 | 71.513911   | 85.06855333 | 23.100095   | 19.14843    |
| 44.345235   | 39.14339233 | 26.60011633 | 16.493932   | 22.76751633 |
| 6.355934    | 6.341891333 | 6.447524667 | 6.7472493   | 6.8691934   |

**Table S2.** Phospholipase D genes in segmental and tandem duplication

| <b>Segmental Duplication</b> |                |                                  |       |                |                                  |             |
|------------------------------|----------------|----------------------------------|-------|----------------|----------------------------------|-------------|
| S.No.                        | Locus ID       | Gene name                        | S.No. | Locus ID       | Gene name                        | AA Homology |
| 1                            | LOC_Os01g07760 | <i>OsPLD<math>\alpha</math>1</i> | 4     | LOC_Os05g07880 | <i>OsPLD<math>\alpha</math>2</i> | 78%         |
| 2                            | LOC_Os10g38060 | <i>OsPLD<math>\beta</math>1</i>  | 5     | LOC_Os03g02740 | <i>OsPLD<math>\beta</math>2</i>  | 75%         |
| 3                            | LOC_Os05g29050 | <i>OsPLD<math>\zeta</math>1</i>  | 6     | LOC_Os01g20860 | <i>OsPLD<math>\zeta</math>2</i>  | 74%         |

**Tandem Duplication**

| S.No. | Locus ID       | Gene name                        | Group | AA Homology |
|-------|----------------|----------------------------------|-------|-------------|
| 1     | LOC_Os06g40190 | <i>OsPLD<math>\alpha</math>3</i> |       |             |
| 2     | LOC_Os06g40170 | <i>OsPLD<math>\alpha</math>4</i> | 1     | 73%         |
| 3     | LOC_Os06g40180 | <i>OsPLD<math>\alpha</math>5</i> |       | 84%         |

**Table S3.** Cis- regulatory elements analysis of OsPLD genes for stress and development specific elements using PlantCARE database. Number of various motifs present in 1kb Upsteam promoter region are given.

| RGAP Locus     | Gene                             | Cis-regulatory elements |     |           |     |                 |       |      |            |
|----------------|----------------------------------|-------------------------|-----|-----------|-----|-----------------|-------|------|------------|
|                |                                  | ABRE                    | MBS | Motif IIB | LTR | TC-rich repeats | Skn-1 | GCN4 | RY-element |
| LOC_Os01g07760 | <i>OsPLD<math>\alpha</math>1</i> | 3                       | 2   | 1         |     |                 | 2     |      |            |
| LOC_Os05g07880 | <i>OsPLD<math>\alpha</math>2</i> | 1                       |     |           | 1   |                 |       |      |            |
| LOC_Os06g40190 | <i>OsPLD<math>\alpha</math>3</i> | 1                       |     |           |     | 1               |       |      |            |
| LOC_Os06g40170 | <i>OsPLD<math>\alpha</math>4</i> | 1                       |     |           |     |                 | 1     | 1    |            |
| LOC_Os06g40180 | <i>OsPLD<math>\alpha</math>5</i> | 2                       | 1   |           | 1   |                 | 2     |      |            |
| LOC_Os03g27370 | <i>OsPLD<math>\alpha</math>6</i> | 1                       | 2   |           |     | 1               | 2     |      |            |
| LOC_Os08g31060 | <i>OsPLD<math>\alpha</math>7</i> |                         |     |           |     | 2               | 2     |      |            |
| LOC_Os09g25390 | <i>OsPLD<math>\alpha</math>8</i> |                         | 1   |           | 1   | 1               | 2     |      |            |
| LOC_Os10g38060 | <i>OsPLD<math>\beta</math>1</i>  | 3                       | 1   | 1         |     |                 | 2     |      |            |
| LOC_Os03g02740 | <i>OsPLD<math>\beta</math>2</i>  | 2                       |     |           |     |                 | 1     |      |            |
| LOC_Os09g37100 | <i>OsPLD<math>\delta</math>1</i> | 1                       | 2   | 2         |     |                 |       | 1    |            |
| LOC_Os03g62410 | <i>OsPLD<math>\delta</math>2</i> |                         | 1   |           | 1   | 2               | 3     | 1    |            |
| LOC_Os07g15680 | <i>OsPLD<math>\delta</math>3</i> |                         |     |           |     | 3               | 1     | 1    | 1          |
| LOC_Os05g29050 | <i>OsPLD<math>\zeta</math>1</i>  | 5                       | 1   |           |     |                 | 2     | 1    |            |
| LOC_Os01g20860 | <i>OsPLD<math>\zeta</math>2</i>  | 3                       |     | 1         | 1   |                 | 1     |      |            |
| LOC_Os06g44060 | <i>OsPLD<math>\phi</math></i>    | 2                       | 1   |           | 1   |                 | 1     |      |            |
| LOC_Os02g02790 | <i>OsPLD<math>\kappa</math></i>  | 1                       |     |           |     |                 |       | 1    | 2          |

**TableS4 .** List of primers used for real time PCR expression analysis

| <b>Gene ID</b>                    | <b>Primer sequence</b>              |
|-----------------------------------|-------------------------------------|
| <i>OsPLD<math>\alpha</math>1F</i> | 5'TCCAAGCCAAGGGAATTGAA3'            |
| <i>OsPLD<math>\alpha</math>1R</i> | 5'CTCACGGTTACCCAAGCAGAA3'           |
| <i>OsPLD<math>\alpha</math>4F</i> | 5'CGG CCG AGA CTC GGA GAT3'         |
| <i>OsPLD<math>\alpha</math>4R</i> | 5'CCA TGG ATT TGA CCT CTT GCA3'     |
| <i>OsPLD<math>\alpha</math>5F</i> | 5'GCC ATT CCT GCA CAC TGC TA3'      |
| <i>OsPLD<math>\alpha</math>5R</i> | 5'CCG GAG ATA GAT TAC ATT GCT TGA3' |
| <i>OsPLD<math>\alpha</math>6F</i> | 5'CGCCATCCTCACCACAT3'               |
| <i>OsPLD<math>\alpha</math>6R</i> | 5'CACTCAGCAAGCACAGCATGA3'           |
| <i>OsPLD<math>\delta</math>1F</i> | 5'CCA GCT GCG TAT GAT GTC TTG3'     |
| <i>OsPLD<math>\delta</math>1R</i> | 5'ATC GTT CAC GCC ATT TCG TT3'      |
| <i>OsPLD<math>\zeta</math>1F</i>  | 5'TGC GCA CAA ACT TTC AGA TGT3'     |
| <i>OsPLD<math>\zeta</math>1R</i>  | 5'TCC CAG GAA TTT GGC TCA GA3'      |
| <i>OsPLD<math>\phi</math>F</i>    | 5'CGG AGT GAG CTG GAC AGT TG3'      |
| <i>OsPLD<math>\phi</math>R</i>    | 5'TCC TAA TGT TGT TGA TGC ATG TGA3' |
| <i>Actin-F</i>                    | 5' CAG CCA CAC TGT CCC CAT CTA 3'   |
| <i>Actin-R</i>                    | 5' AGC AAG GTC GAG ACG AAG GA 3'    |
